# Supplementary material for: Working with Zika and Usutu Viruses In Vitro
Source: PLoS Negl Trop Dis. 2016 Aug 19;10(8):e0004931. doi: 10.1371/journal.pntd.0004931 (PMC4991799; doi:10.1371/journal.pntd.0004931)
Supplement: S1 Data — The data presented are the raw Ct values and relative viral titers derived from cell culture supernatant collected 72 hours post infection. Relative viral titers were estimated based on a standard curve constructed using serial dilutions of virus which were fit to plaque numbers produced in LLC-MK2 cells. (XLSX) [file pntd.0004931.s001.xlsx]

## Sheet: Sheet1
			Ct values 72 Hours Post Infection						Average Relative Titer as Determined by RT-PCR 72 Hours Post-Infection
ID#	Cell	Virus	R1	R2	R3				ID#	Cell	Virus	R1	R2
137	OK	USUTU	13.8	10.88	11.83				137	OK	USUTU	32400000	14300000
138	OK	USUTU	14.91	11.13	13.16				138	OK	USUTU	28100000	5410000
139	OK	USUTU	13.62	10.95	13.21				139	OK	USUTU	31100000	5190000
140	E.Derm	USUTU	21.85	19.29	20.86				140	E.Derm	USUTU	259000	19300
141	E.Derm	USUTU	22.22	19.86	20.28				141	E.Derm	USUTU	186000	29500
142	E.Derm	USUTU	22.84	20.52	20.56				142	E.Derm	USUTU	127000	24000
143	CRFK	USUTU	18.76	16.39	18.06				143	CRFK	USUTU	1370000	150000
144	CRFK	USUTU	18.66	16.03	17.26				144	CRFK	USUTU	1680000	269000
145	CRFK	USUTU	18.99	16.75	17.38				145	CRFK	USUTU	1110000	245000
146	BT	USUTU	25.59	23.43	24.17				146	BT	USUTU	2400000	1700
147	BT	USUTU	26.23	23.9	25.45				147	BT	USUTU	18300	670
148	BT	USUTU	26.45	24.27	25.04				148	BT	USUTU	14800	904
149	EA.hy.926	USUTU	27.23	24.58	24.84				149	EA.hy.926	USUTU	12400	1040
150	EA.hy.926	USUTU	25.94	23.44	23.6				150	EA.hy.926	USUTU	23800	2580
151	EA.hy.926	USUTU	28.53	25.75	26.12				151	EA.hy.926	USUTU	6330	410
152	WCH-17	USUTU	37.91	29.71	30.64				152	WCH-17	USUTU	653	15
153	WCH-17	USUTU	36.86	31.67	30.83				153	WCH-17	USUTU	211	13
154	WCH-17	USUTU	36.29	29.44	34.25				154	WCH-17	USUTU	759	1.07
155	Dn1Tr	USUTU	26.76	24.53	26.45				155	Dn1Tr	USUTU	12800	320
156	Dn1Tr	USUTU	28.15	25.64	25.91				156	Dn1Tr	USUTU	6750	476
157	Dn1Tr	USUTU	26.56	24.29	24.45				157	Dn1Tr	USUTU	14600	1390
158	Tb.1 Lu	USUTU	21.67	19.79	20.44				158	Tb.1 Lu	USUTU	193000	26100
159	Tb.1 Lu	USUTU	23.09	20.99	22.74				159	Tb.1 Lu	USUTU	97300	4870
160	Tb.1 Lu	USUTU	22.58	20.7	21.01				160	Tb.1 Lu	USUTU	115000	17300
161	OHH1K	USUTU	20.72	18.59	18.34				161	OHH1K	USUTU	385000	122000
162	OHH1K	USUTU	19.83	17.87	18.22				162	OHH1K	USUTU	585000	133000
163	OHH1K	USUTU	19.48	17.15	17.23				163	OHH1K	USUTU	884000	274000
164	MDCK	USUTU	20.17	17.49	18.1				164	MDCK	USUTU	727000	145000
165	MDCK	USUTU	20.37	18.09	18.96				165	MDCK	USUTU	515000	77600
166	MDCK	USUTU	20.49	16.96	17.11				166	MDCK	USUTU	985000	300000
167	FoLu	USUTU	18.94	16.35	16.85				167	FoLu	USUTU	1390000	362000
168	FoLu	USUTU	19.58	17.09	17.42				168	FoLu	USUTU	911000	238000
169	FoLu	USUTU	19.09	17.49	16.66				169	FoLu	USUTU	727000	415000
170	PL1ut	USUTU	26.09	25.34	23.9				170	PL1ut	USUTU	7990	2080
171	PL1ut	USUTU	28.97	26.98	25.49				171	PL1ut	USUTU	3120	650
172	PL1ut	USUTU	27.68	26.99	28.91				172	PL1ut	USUTU	3110	53.1
182	Mv1lu	USUTU	20.79	17.13	18.96				182	Mv1lu	USUTU	890000	77100
183	Mv1lu	USUTU	21.09	20.66	18.9				183	Mv1lu	USUTU	118000	80800
184	Mv1lu	USUTU	22.92	21.3	19.75				184	Mv1lu	USUTU	81600	43300
185	SF-1	USUTU	26.34	26.9	23.36				185	SF-1	USUTU	3270	3100
186	SF-1	USUTU	28.18	25.21	23.89				186	SF-1	USUTU	8610	2090
187	SF-1	USUTU	28.73	28.11	23.8				187	SF-1	USUTU	1630	2240
188	PK-15	USUTU	17.79	17.78	13.12				188	PK-15	USUTU	615000	5570000
189	PK-15	USUTU	18.91	18.15	15.07				189	PK-15	USUTU	496000	1340000
190	PK-15	USUTU	19.1	19.05	16.19				190	PK-15	USUTU	297000	587000
191	DF1	USUTU		17.72	17.87				191	DF1	USUTU	674000	606000
192	DF-1	USUTU		17.93	18.85				192	DF1	USUTU	583000	311000
193	DF-1	USUTU		17.34	17.73				193	DF1	USUTU	877000	667000
194	LLC-MK2	USUTU		18.85	18.05				194	LLC-MK2	USUTU	309000	537000
195	LLC-MK2	USUTU		18.89	20.08				195	LLC-MK2	USUTU	302000	134000
196	LLC-MK2	USUTU		18.54	18.67				196	LLC-MK2	USUTU	384000	350000
43	OK	ZIKA	26.59	14.29	21.5				43	OK	ZIKA	3320000	6040
44	OK	ZIKA	22.83	14.28	13.34				44	OK	ZIKA	3350000	52900000
45	OK	ZIKA	24.75	13.64	13.18				45	OK	ZIKA	5000000	63200000
46	E.Derm	ZIKA	26.18	16.01	15.66				46	E.Derm	ZIKA	1140000	4030000
47	E.Derm	ZIKA	26.97	16.01	16.77				47	E.Derm	ZIKA	1130000	1170000
48	E.Derm	ZIKA	19.54	16.79	16.6				48	E.Derm	ZIKA	699000	1400000
49	CRFK	ZIKA	16.56	13.65	15.98				49	CRFK	ZIKA	4980000	2820000
50	CRFK	ZIKA	14.99	13.86	16.04				50	CRFK	ZIKA	4360000	2640000
51	CRFK	ZIKA	16.68	13.84	13.36				51	CRFK	ZIKA	4420000	52200000
52	BT	ZIKA	20.5	19.17	18.68				52	BT	ZIKA	158000	139000
53	BT	ZIKA	21.83	19.83	19.51				53	BT	ZIKA	104000	55500
54	BT	ZIKA	18.85	17.93	20.48				54	BT	ZIKA	342000	18800
55	EA.hy.926	ZIKA	20.19	18.72	17.95				55	EA.hy.926	ZIKA	209000	312000
56	EA.hy.926	ZIKA	26.59	24.76	24.6				56	EA.hy.926	ZIKA	4770	191
57	EA.hy.926	ZIKA	18.92	17.67	17.4				57	EA.hy.926	ZIKA	401000	576000
58	WCH-17	ZIKA	36.45	32.3	-				58	WCH-17	ZIKA	0	0
59	WCH-17	ZIKA	33.93	32.4	-				59	WCH-17	ZIKA	0	0
60	WCH-17	ZIKA	34.19	30.94	-				60	WCH-17	ZIKA	0	0
61	Dn1Tr	ZIKA	17.9	17.04	19.79				61	Dn1Tr	ZIKA	597000	40400
62	Dn1Tr	ZIKA	18.11	18.29	18.81				62	Dn1Tr	ZIKA	272000	120000
63	Dn1Tr	ZIKA	18.31	17.42	17.29				63	Dn1Tr	ZIKA	469000	656000
64	Tb.1 Lu	ZIKA	31.05	29.91	29.69				64	Tb.1 Lu	ZIKA	0	0
65	Tb.1 Lu	ZIKA	32.66	31.92	31.51				65	Tb.1 Lu	ZIKA	0	0
66	Tb.1 Lu	ZIKA	33.28	31.17	31.45				66	Tb.1 Lu	ZIKA	0	0
67	OHH1K	ZIKA	18	16.93	16.81				67	OHH1K	ZIKA	640000	1110000
68	OHH1K	ZIKA	17.55	16.87	19.66				68	OHH1K	ZIKA	662000	46700
69	OHH1K	ZIKA	17.26	16.26	20.24				69	OHH1K	ZIKA	973000	245000
70	MDCK	ZIKA	20.24	19.14	24.96				70	MDCK	ZIKA	160000	128
71	MDCK	ZIKA	21.14	20.23	24.72				71	MDCK	ZIKA	81200	167
72	MDCK	ZIKA	20.14	19.51	24.13				72	MDCK	ZIKA	127000	322
73	FoLu	ZIKA	15.4	14.71	18.7				73	FoLu	ZIKA	2560000	137000
74	FoLu	ZIKA	21.7	16.6	16.31				74	FoLu	ZIKA	785000	1950000
75	FoLu	ZIKA	19.07	14.25	13.61				75	FoLu	ZIKA	3410000	39400000
76	PL1ut	ZIKA	26.49	21.54	21.46				76	PL1ut	ZIKA	35600	6290
77	PL1ut	ZIKA	26.24	21.81	21.54				77	PL1ut	ZIKA	30100	5760
78	PL1ut	ZIKA	26.36	21.31	20.52				78	PL1ut	ZIKA	41300	18000
79	DF-1	ZIKA	28.15	22.85	24.62				79	DF-1	ZIKA	15700	186
80	DF-1	ZIKA	28.77	24.2	27.92				80	DF-1	ZIKA	6740	4.77
81	DF-1	ZIKA	22.83	21.63	22.33				81	DF-1	ZIKA	33800	2390
82	LLC-MK2	ZIKA	20.94	14.93	14.67				82	LLC-MK2	ZIKA	2230000	12000000
83	LLC-MK2	ZIKA	20.35	15.76	20.48				83	LLC-MK2	ZIKA	1330000	18700
84	LLC-MK2	ZIKA	21.22	15.62	16.39				84	LLC-MK2	ZIKA	1450000	1780000
100	Mv1Lu	ZIKA	26.27	19.05	23.34				85	Mv1Lu	ZIKA	169000	778
101	Mv1Lu	ZIKA	26.76	19.73	20.08				86	Mv1Lu	ZIKA	110000	29300
102	Mv1Lu	ZIKA	28.36	22.55	21.7				87	Mv1Lu	ZIKA	19000	4810
103	SF-1	ZIKA	25.79	18.61	22.71				88	SF-1	ZIKA	223000	1560
104	SF-1	ZIKA	24.96	20.44	21.16				89	SF-1	ZIKA	71000	8770
105	SF-1	ZIKA	25.59	18.56	21.45				90	SF-1	ZIKA	230000	6390
106	PK-15	ZIKA	19.65	14.76	15.08				91	PK-15	ZIKA	2480000	7690000
107	PK-15	ZIKA	20.11	15.38	16.38				92	PK-15	ZIKA	1690000	1800000
108	PK-15	ZIKA	20.3	14.2	17.39				93	PK-15	ZIKA	3520000	586000
	Binding assay data
		R1	R2	R3
Zika	tb1 lu	20.63	20.38	20.7
Zika	WHC-17	20.84	19.85	19.89
Usustu	WHCH-17	21.22	20.83	20.93
Zika	llc-mk2	20.09	20.91
Usutu	llc-mk2	20.95	20.97
